# Supplementary material
Source: publisher site journal article supplement (https://www.spandidos-publications.com/2614/downloadSupplementary)
Supplement: Supplementary file 1 [file downloadSupplementary]

## Sheet: Table SXII
Table SXII. Multivariate Cox proportional hazards regression of miR150 on patients' survival grouped by stage.
Variable	Stage I/II				Stage III/IV
	Na	Median (Q1-Q3)b	HR (95% CI)	P-valuec	Na	Median (Q1-Q3)b	HR (95% CI)	P-valuec
Overall survival
miR150 (continuous)	787		0.72 (0.56-0.92)	0.01	265		0.67 (0.44-1.02)	0.064
miR150 (categorical)d
Low	522	25.20 (14.69-52.86)	Reference		182	21.41 (12.25-41.32)	Reference
High	265	38.57 (19.19-71.94)	0.15 (0.04-0.60)	0.007	83	28.88 (16.32-61.86)	0.49 (0.10-2.43)	0.384
Disease-free survival
miR150 (continuous)	733		0.84 (0.66-1.06)	0.139	234		0.44 (0.25-0.79)	0.006
miR150 (categorical)d
Low	484	22.80 (13.90-44.38)	Reference		155	19.32 (11.98-35.02)	Reference
High	249	35.91 (17.28-70.80)	0.48 (0.17-1.32)	0.154	79	31.93 (15.16-57.70)	0.07 (0.01-0.70)	0.024
a Number of samples, some of these variables have missing values.
b Data were shown as median (Q1-Q3 quantiles) overall or disease-free survival months.
c P-values were adjusted for diagnosis age, ER status, PR status, HER2 status, copy number alterations, lymph nodes examined number and mutation count.
d Low: miR150 <9.55, High: miR150 ≥9.55.
